# Supplementary material for: Improving Fundamental Movement Skills during Early Childhood: An Intervention Mapping Approach
Source: MDPI journal article supplement (doi:10.3390/children10061004), 2023-06-02
Supplement: s1 [file s1]

## Supplementary materials

**Table S1** Planning group Focus group themes and comments Step 1

| Step one areas                             | Researchers' themes and quotes                                                                                                                                        | Parents themes and quotes                                                                                                                                                 | Teachers', coaches, SLT themes and quotes                                                                                                                                                                                                     |
|--------------------------------------------|-----------------------------------------------------------------------------------------------------------------------------------------------------------------------|---------------------------------------------------------------------------------------------------------------------------------------------------------------------------|-----------------------------------------------------------------------------------------------------------------------------------------------------------------------------------------------------------------------------------------------|
| Who's problem is it?                       |                                                                                                                                                                       | Family and parents, school                                                                                                                                                | Headteachers, teachers ('It depends on confidence'), families                                                                                                                                                                                 |
| Who is the Problem affecting?              | 'Children are arriving at school inactive'                                                                                                                            |                                                                                                                                                                           | 'Obesity is um, a ridiculously growing problem in this country'                                                                                                                                                                               |
| Individual behaviours causing the problem  | Children are inactive at home<br>Children are not developing their motor skills                                                                                       | Culture and mentality<br>'kids aren't as bothered' about PA<br>High screen time and use of technology                                                                     | Use of technology 'sit and look into iPads and Xboxes'<br>'Children having more access to, to, tablets, computers, culturally things have changed in terms of playing outside'                                                                |
| Environment conditions causing the problem | Teachers/staff 'undertrained' and 'not enthusiastic'<br>Individual 'school level won't create change' in the whole system<br>Previous Intervention 'too prescriptive' | Restriction of free play<br>Pick up and drop off culture<br>Lack of facilities for PA and 'things not being open'<br>'School provision [for PA] isn't great'              | 'I think if the school's got good resources... and we had funding'<br>'Play led but not enough specific skills'<br>families: 'they won't do anything that upsets their child'<br>'There isn't really much emphasis on like developing skills' |
| Determinants of these behaviours           | 'Self-efficacy for the children would be to have a go at a new skill'<br>Deprivation<br>Low confidence and self-efficacy of teachers<br>School philosophy             | Education of parents and lack of confidence- 'be careful' culture<br>Having other children to play with<br>Money and deprivation 'after school clubs aren't free anymore' | '[Children] don't have that opportunity at home because their parents, they can't afford to take them to do extra-curricular things'<br>'I don't believe that there's adequate PE time'                                                       |
| Social assets                              | Family, schools can create 'awareness'                                                                                                                                | Football and multicurricular clubs<br>'Play with peers and older siblings'                                                                                                |                                                                                                                                                                                                                                               |
| Information assets                         | Teachers could be if 'enthusiastic'                                                                                                                                   | Word of mouth- 'other parents'                                                                                                                                            | Teachers- depends on confidence levels<br>'A really good resource and you can dip into it and out'                                                                                                                                            |
| Policy Assets                              | National governing bodies<br>Change needs to come from 'policy level to get widespread effects and there needs to be an incentive to be involved'                     | 'Schools can vary quite dramatically in their provision, time and access to PA'                                                                                           | 'A huge culture shift I think to overcome some of that'                                                                                                                                                                                       |
| Environment Assets                         | Schools are 'equitable and accessible to all children'                                                                                                                | Active transport to school<br>Free play outside 'in good weather'<br>PE 'part of the school day'                                                                          | 'More active lessons, much more standing up and moving round and talking to other people'<br>'To be outside and to be doing things outside'                                                                                                   |

PA= physical activity, PE=Physical education

**Table S2.** Potential desired outcomes

|                                                                                |
|--------------------------------------------------------------------------------|
| <b>Behavioural:</b>                                                            |
| Increase the amount of time EYFS children engage in FMS practice at school     |
| Increase the amount of time EYFS children spend doing PA at home and at school |
| Reduce the sedentary time of EYFS children at home and at school               |
| <b>Environmental:</b>                                                          |
| Increase the provision of FMS delivery by 25% at the EYFS in schools           |
| Increase the number of schools developing an EYFS PE curriculum                |
| Increase the number of teachers receiving PE and PA training                   |

**Table S3** Matrices of change: Behavioural Outcome

| <b>Behavioural Outcome: 1.0 Increase the number of EYFS children engaging in FMS practice</b>                        |                                                                                                                  |                                                                                                         |                                                                                                                                                 |                                                                                                           |  |
|----------------------------------------------------------------------------------------------------------------------|------------------------------------------------------------------------------------------------------------------|---------------------------------------------------------------------------------------------------------|-------------------------------------------------------------------------------------------------------------------------------------------------|-----------------------------------------------------------------------------------------------------------|--|
| <b>Performance objective</b>                                                                                         | <b>Change Objectives for Personal Determinants</b>                                                               |                                                                                                         |                                                                                                                                                 |                                                                                                           |  |
|                                                                                                                      | <b>Mastery Level of FMS</b>                                                                                      | <b>Self-efficacy/physical self-concept</b>                                                              | <b>Perceived Norms and enjoyment</b>                                                                                                            | <b>Knowledge</b>                                                                                          |  |
| <b>PO.1.1 Increase the % of children spending 10% more time doing PA in school each week</b>                         | <b>ML.1.1.</b> Children demonstrate greater mastery of FMS to use in PA in free play situations and environments | <b>SE.1.1.</b> Children demonstrate confidence when performing PA and chose multiple forms of PA        | <b>PN.1.1.</b> Children enjoy and perform increased levels of total PA                                                                          | <b>K1.1.</b> Children can describe an FMS based game learnt at school                                     |  |
| <b>PO.1.2 Increase the % of children taking part in structured and unstructured FMS related activities each week</b> | <b>ML.1.2.</b> Children demonstrate the FMS ability to participate in physical FMS games each week               | <b>SE.1.2.</b> Children demonstrate confident use of skill within 2 or more game environments           | <b>PN.1.2.</b> Children chose to participate in FMS based games/activities when offered during free choice play opportunities                   | <b>K.1.2.</b> Children know what different kinds of FMS are through physical and classroom-based activity |  |
| <b>PO.1.3 Increase the % of children setting FMS and PA performance goals at school</b>                              | <b>ML.1.3.</b> Children can continue to master new FMS and PA goals set at school                                | <b>SE.1.3.</b> Children know how to begin to set their own goals e.g., catching a ball 3 times in a row | <b>PN.1.1.</b> Children are involved in setting individual goals with their parent/teachers for PA. E.g., walk or scooter to school once a week | <b>K.1.3.</b> Children know how to use feedback, can explain their FMS skills and goals set               |  |

FMS=fundamental movement skills, PA= physical activity

**Table S4** Matrices of change: Environmental Outcome

| <b>2.0 Increase the provision of FMS delivery by 20% at the EYFS in schools</b>                                             |                                                                                                                                                                                          |                                                                                                                                                            |                                                                                                                                                                                                            |                                                                                                                                     |                                                                                                                                             |
|-----------------------------------------------------------------------------------------------------------------------------|------------------------------------------------------------------------------------------------------------------------------------------------------------------------------------------|------------------------------------------------------------------------------------------------------------------------------------------------------------|------------------------------------------------------------------------------------------------------------------------------------------------------------------------------------------------------------|-------------------------------------------------------------------------------------------------------------------------------------|---------------------------------------------------------------------------------------------------------------------------------------------|
| <b>Performance objective</b>                                                                                                | <b>Change Objectives for Personal (environmental) Determinants</b>                                                                                                                       |                                                                                                                                                            |                                                                                                                                                                                                            |                                                                                                                                     |                                                                                                                                             |
|                                                                                                                             | <b>Knowledge</b>                                                                                                                                                                         | <b>Social norms</b>                                                                                                                                        | <b>Teacher self-efficacy</b>                                                                                                                                                                               | <b>Parental Beliefs</b>                                                                                                             | <b>Outcome expectations</b>                                                                                                                 |
| <b>PO.2.1</b><br><br><b>Increase the number of teachers facilitating FMS practice in EYFS settings</b>                      | <b>K.2.1.</b> Teachers know how to implement the provided training sessions and resources. Teachers demonstrate an increased knowledge for facilitating FMS practice in a school setting | <b>SN.2.1.</b> Teachers demonstrate that it is important their school community provides FMS practice. Their school provides environments for FMS practice | <b>TSE.2.1.</b> Teachers show increased self-confidence to lead sessions with an FMS focus, and know how to give sufficient positive and skill specific feedback, adapted to suit the ability of the child | <b>PB.2.1.</b> SLT and Teachers in schools can share information with parents about FMS and benefits behind the programme           | <b>OE.2.1.</b> Teachers expect that providing better structure in existing and new PA opportunities, will improve children's PA and FMS     |
| <b>PO.2.2</b> <b>Increase the number of teachers planning for PE, PA, and FMS in schools</b>                                | <b>K.2.2.</b> Key agents (teachers and SLTs) know how to be equipped with materials and resources to improve planning, including an adaptable framework                                  | <b>SN.2.2.</b> Teachers make give FMS and PA equal status as academic subjects and highlight the PE premium use                                            | <b>TSE.2.2.</b> Teacher can show evidence of planning for effective PA and saving time in the process                                                                                                      | <b>PB.2.2.</b> School/teachers share information of how PA and FMS can be improved in the home environment and prepare child for PE | <b>OE.2.2.</b> Teachers expect to use a framework and improve the quality of current PA by structuring more opportunities to improve PA/FMS |
| <b>PO.2.3</b> <b>Increase the number of teachers aware of the benefits of providing EYFS children with PA opportunities</b> | <b>K.2.3.</b> Teachers can explain why PA for children is important for physical, mental, and social health, in addition to enhancing academic achievement                               | <b>SN.2.3.</b> Teachers can demonstrate the importance of a whole class targets and individual goals to perform a certain amount of PA per week            | <b>TSE.2.3.</b> Teacher can explain effective ways to engage children in more PA outside of PE and assess their skills                                                                                     | <b>PB.2.3.</b> Teacher knows how to share information about the benefits of PA to parents                                           | <b>OE.2.3.</b> Teachers expect to allocate more specific times to dedicated PA-twice a week in non-PE subjects                              |

FMS=fundamental movement skills, PA= physical activity, PE= physical education, EYFS= early years foundation stage

**Table S5** Planning group Focus group themes and comments Step 3: Task 3.1

| Step three areas             | Researchers themes and quotes                                                                                                                                                         | Parents themes and quotes                                                                                                                                                                                                                         | Teachers, coaches, SLT themes and quotes                                                                                                                                                                                                                                                                         | Children themes and ideas                                                                         |
|------------------------------|---------------------------------------------------------------------------------------------------------------------------------------------------------------------------------------|---------------------------------------------------------------------------------------------------------------------------------------------------------------------------------------------------------------------------------------------------|------------------------------------------------------------------------------------------------------------------------------------------------------------------------------------------------------------------------------------------------------------------------------------------------------------------|---------------------------------------------------------------------------------------------------|
| Programme Themes             | <p>‘Autonomous activity’</p> <p>‘Children enjoy having freedom and ownership of their experiences’</p> <p>Previously experienced: Gruffalo, acting out story books with movements</p> | <p>Dinosaurs, cars/trucks, superheroes, Bluey (many agreed Bluey was a good cartoon role model)</p> <p>‘Working together’</p> <p>‘We do lots of role play as a family’</p>                                                                        | <p>‘Progress in, in actually not just sport but in physical um, in physical life’</p> <p>‘5-minute movements’</p> <p>‘Simple skills’</p>                                                                                                                                                                         | <p>Superheroes, book characters, cartoons, movie characters (see table A7 for further detail)</p> |
| Programme Components         | <p>Connection between the school and home environment</p> <p>Improving ‘teacher self-efficacy’</p> <p>‘Hide in fun to improve other skills’ such as numeracy</p>                      | <p>‘Not instructional activity’</p> <p>Competitive elements such as ‘racing’</p> <p>‘Progressing through levels’</p> <p>‘Physical activity homework, within their existing school framework’</p> <p>‘Education of teachers and head teachers’</p> | <p>‘I think maybe an overarching overview, so where their skill development is, and like a progression of skills document’</p> <p>‘Having new ideas and thing put into like the frame[work]’</p> <p>‘Having focussed lessons, um, I think will see it improve’</p>                                               | <p>Games based activities for children- ‘parachute’, ‘shark game’, ‘tag football’</p>             |
| Programme Sequence           | <p>‘Keeping it simple helps the buy in’</p> <p>‘Keeping a connection between the home and school environment’</p>                                                                     | <p>‘Do stuff they [children] know and has structure’</p> <p>‘I think it should sit within the school framework, slot into regular assessments’</p>                                                                                                | <p>‘Giving them [children] opportunities to practice and then keep teaching them’</p> <p>‘The children get different opportunities throughout the week’</p>                                                                                                                                                      |                                                                                                   |
| Programme Scope and duration | <p>‘Daily activity helps to keep them involved’</p> <p>Create as an ‘enrichment’ activity for the children</p>                                                                        | <p>School to manage the programme- and ‘let the children be independent in the environment’</p> <p>App development- ‘gamification’ of elements</p>                                                                                                | <p>‘If we can teach everyone at the same time its inclusive’</p> <p>‘The teachers and the heads want something concrete to be left behind’</p> <p>‘If you give them [teacher] a framework and scaffold and some structure, they’d be happy to carry it on’ and ‘You need to be doing it 3 or 4 times a week’</p> |                                                                                                   |

**Table S6** Planning group Focus group themes and comments Step 3: Task 3.3 measurement of the programme, programme environments and creating awareness

| Step three areas             | Researchers themes and quotes                                                                                                                                                               | Parents themes and quotes                                                                                                                                                                                                                 | Teachers, coaches, SLT themes and quotes                                                                                                                                                                                                                                                                                                                                                                     | Children themes and ideas                                                                                                                                                          |
|------------------------------|---------------------------------------------------------------------------------------------------------------------------------------------------------------------------------------------|-------------------------------------------------------------------------------------------------------------------------------------------------------------------------------------------------------------------------------------------|--------------------------------------------------------------------------------------------------------------------------------------------------------------------------------------------------------------------------------------------------------------------------------------------------------------------------------------------------------------------------------------------------------------|------------------------------------------------------------------------------------------------------------------------------------------------------------------------------------|
| Measurement of the programme | Logbooks to examine children's physical literacy<br><br>Teacher to report using 'formative feedback'<br><br>'Physical development judgements are part of the EYFS, so working it into that' | 'Slot into the school framework' e.g., part of reports home<br><br>'[child has] confidence to take part in a new sport (activity)'<br><br>'Education of teachers and head teachers'<br>'Evaluating the physical and holistic development' | 'Sense of achievement for the children' ... 'a bit of aspiration, they're trying to beat their score'<br><br>'So, they could see progression in themselves, that they were able to do that'<br><br>'We do a thing called impact report... we do it overall as a year group'<br><br>'Regardless of if it's like scientific or if it's you can catch three times rather than two times by the end of the year' | Children stated in their focus groups that PE made them feel: 'happy', 'excited', that they were having 'fun', the programme must achieve this and should be evaluated by teachers |
| Programme Environments       | 'Outdoor environments for autonomous activity'<br><br>'Indoor and classroom active breaks'<br><br>Vary the environment to allow adaptation for 'wet play situations'                        | 'Free play environments'<br><br>'Leaving the house' outdoors and unfamiliar environments<br><br>'Social environments with their peers'                                                                                                    | 'Lots of access to outdoor play and to be able to run and to walk and to ride a bike and to ride tricycles'<br><br>'Open flow through the classroom area and out into the outdoor area'                                                                                                                                                                                                                      | Playing Outdoors<br>Equipment- climbing frames, parachutes, balls, sandpits, hula hoops<br>Indoors for climbing, dancing                                                           |
| Creating awareness           | Highlight the benefits of the programme to the teachers- 'what they're judged on' e.g., improving school readiness of the children                                                          | Something 'that physically comes home in a pack, rather than online' (for parents)<br><br>'To get support to do it at home as PA homework'                                                                                                | 'Somebody there to disseminate that knowledge and work with them [teachers]'                                                                                                                                                                                                                                                                                                                                 | Non-PA based activities to increase children's awareness of FMS skills (see Table 5.11 for detail)                                                                                 |

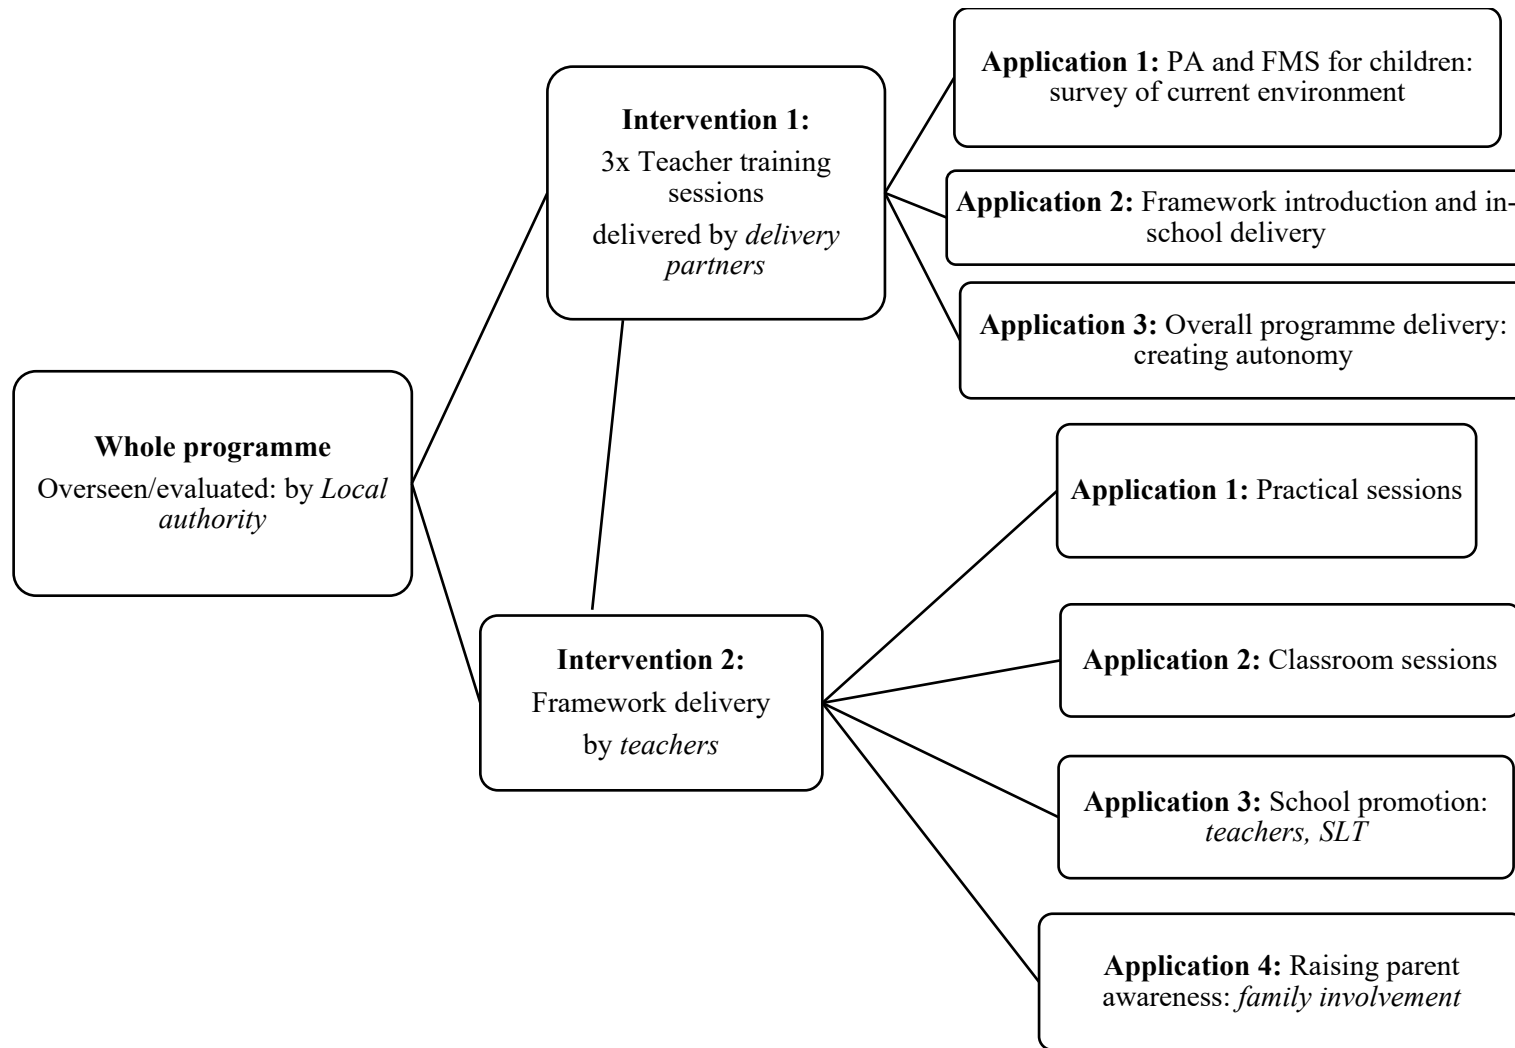

**Figure S1.** Task 4.1: Programme structure and organisation  
FMS=fundamental movement skills, PA= physical activity, SLT= senior leadership team

**Table S7** Task 4.3: Focus group themes and answers

| Programme design area      | Child FG answers                                                                                                                         | Other FG suggestion                                                                                                                                               |
|----------------------------|------------------------------------------------------------------------------------------------------------------------------------------|-------------------------------------------------------------------------------------------------------------------------------------------------------------------|
| Equipment                  | Parachutes, balls, sand pit, climbing frames, hula hoops, rackets                                                                        |                                                                                                                                                                   |
| Environments               | Outdoors, classroom/hall spaces                                                                                                          | ‘Independent environments’, ‘getting outside’                                                                                                                     |
| Types of activities        | Building, ‘playing with my friends’, ‘making up my own games’, games with easy-to-understand rules, dancing, football, climbing, running | ‘Making things up, using their imagination’ ‘jumping off things, climbing up stuff’, games- ‘racing each other’, ‘acting out a story’, ‘education hiding in fun’, |
| Themes of games/activities | ‘Shark game’, Dinosaurs, Zog, Thomas the Tank Engine, Spiderman, Supergirl, Superman, Paw Patrol, Rapunzel, Harry Potter,                | Superheroes, role play, ‘family involvement’                                                                                                                      |
| Non-physical activities    | Reading, literacy, doing puzzles, ‘new things’                                                                                           | ‘Use of an app’, ‘classroom active breaks’                                                                                                                        |

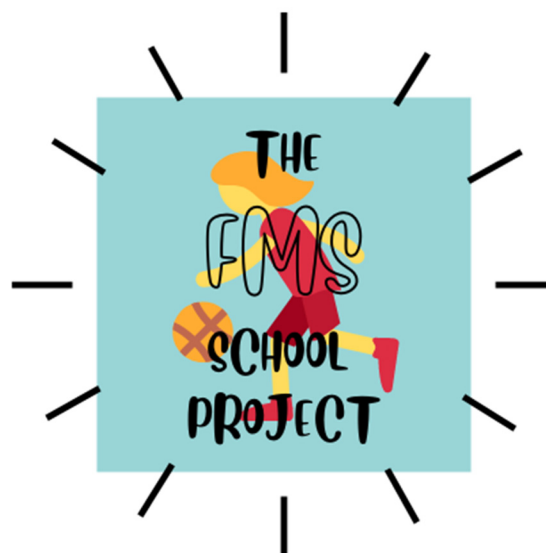

**Figure S2.** The FMS School Project logo

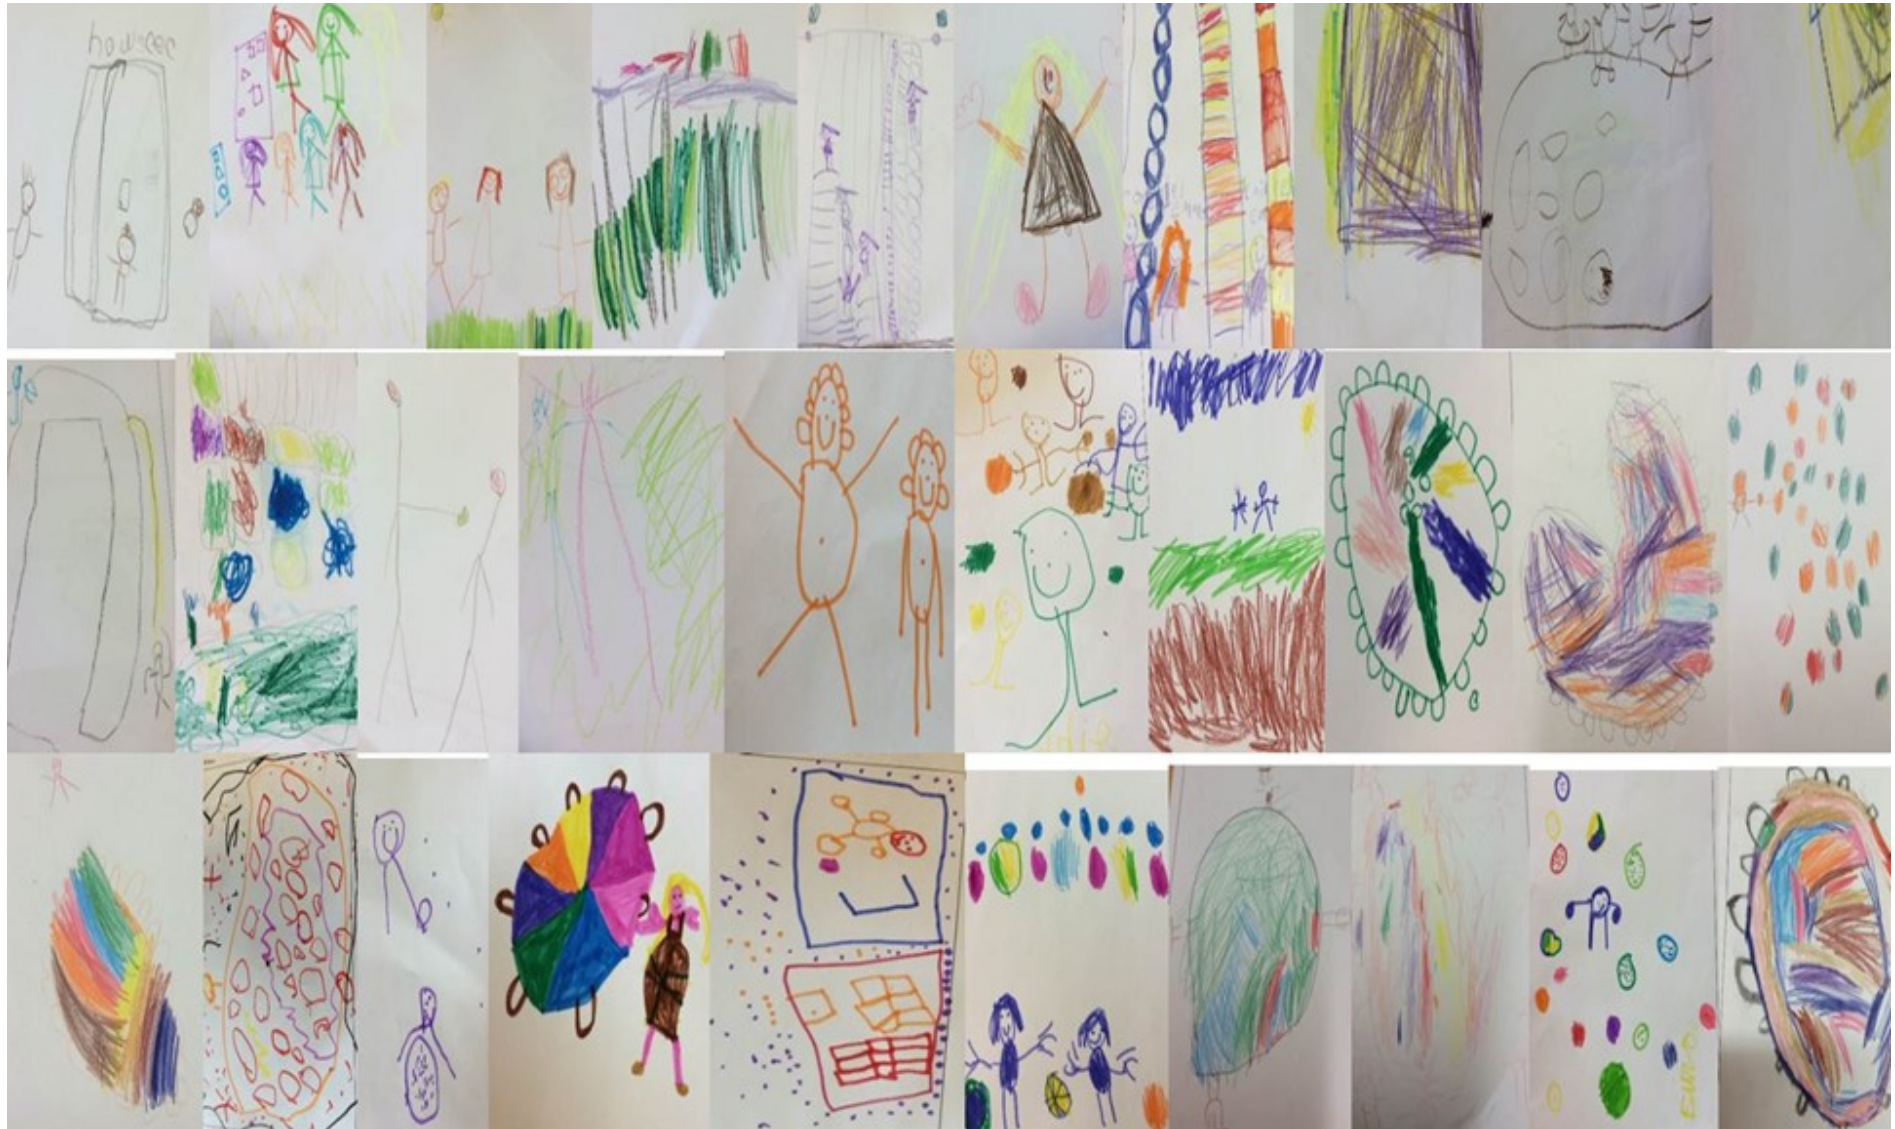

**Figure S3.** Drawings produced by children in FG1C about their favourite part of physical education.



**Supplementary Session S1.** Session plan for EYFS children

|                                 |                                                                                                                                                                                                                                                                                                                                                                                                                                                                                                                                                                                                                                                                                                                                                                                                                                                                                                                                                                                                                     |                                                                          |                                            |
|---------------------------------|---------------------------------------------------------------------------------------------------------------------------------------------------------------------------------------------------------------------------------------------------------------------------------------------------------------------------------------------------------------------------------------------------------------------------------------------------------------------------------------------------------------------------------------------------------------------------------------------------------------------------------------------------------------------------------------------------------------------------------------------------------------------------------------------------------------------------------------------------------------------------------------------------------------------------------------------------------------------------------------------------------------------|--------------------------------------------------------------------------|--------------------------------------------|
| <p><b>Time:</b><br/>35 mins</p> | <p><b>Aim(s):</b></p> <ol style="list-style-type: none"> <li>1) Practice and begin to develop at least 3 skills (jump, coordination)</li> <li>2) Discover new pieces of equipment, think of ways to use these objects.</li> <li>3) Develop our teamwork and listening skills</li> </ol>                                                                                                                                                                                                                                                                                                                                                                                                                                                                                                                                                                                                                                                                                                                             | <p><b>Equipment:</b><br/>Cones, hoops, woggles, balls, rackets, bibs</p> |                                            |
| <p><b>Activities:</b></p>       | <p><b>1. <u>Fogs and lily pads</u></b></p> <ul style="list-style-type: none"> <li>▪ Ask the children to show you how a frog would jump- the children should use their imagination to do this. You can also ask the children what noise a frog might make.</li> <li>▪ Set out spots across the playing area as 'lily pads', ask the children to travel as frogs between the lily pads</li> <li>▪ Include demonstration of jumping to give the children a visual guide</li> </ul> <p>S- ask children what shape the pond is, get them to think about shapes, make the pond bigger so they must jump further<br/> T- Children could become pond skaters and move across the pond on all fours<br/> E- When a child reaches a lily pad, they must perform a balance/ lily pad could be hoops<br/> P- one big pond or lots of smaller ponds, working in pairs</p>                                                                                                                                                        | <p><b>skills focus</b></p>                                               | <p>1. Jumping and locomotor skills</p>     |
|                                 | <p><b>2. <u>Equipment Discovery</u></b></p> <ul style="list-style-type: none"> <li>▪ Within the playing area set up a selection of equipment for the children to use, including hoops, woggles, balls (3 different sizes), rackets.</li> <li>▪ Ask the children to use and play with the equipment however they like e.g., they could make up games or build different structures for example.</li> <li>▪ Observe how the children use a variety of equipment, how they move e.g., actions like squatting down, the grip they use to hold equipment.</li> </ul> <p>S- use both indoor and outdoor settings, pretend children are in different natural environments.<br/> T- set tasks such as making an obstacle course and others in the class completing it<br/> E- each time this task is used with the children introduce a new piece of equipment or remove a previous piece so that children become more imaginative<br/> P- children can work individually, in pairs, small groups, or as a whole class.</p> |                                                                          | <p>2. Combination and discovery skills</p> |

|                     |                                                                                                                                                                                                                                                                                                                                                                                                                                                                                                                                                                                                                                                                                                                                     |  |                                          |
|---------------------|-------------------------------------------------------------------------------------------------------------------------------------------------------------------------------------------------------------------------------------------------------------------------------------------------------------------------------------------------------------------------------------------------------------------------------------------------------------------------------------------------------------------------------------------------------------------------------------------------------------------------------------------------------------------------------------------------------------------------------------|--|------------------------------------------|
|                     | <p>3. <u>Move through the hoop</u></p> <ul style="list-style-type: none"> <li>Start with a hoop that is big enough for all the children to fit through</li> <li>The children should stand in a circle holding hands, they must pass the hoop up or over each one of them in the full circle</li> </ul> <p>S- start as a whole class task in one big group, decrease into smaller groups<br/> T- challenge the children to do it faster than they did it the previous time<br/> E- use a bigger hoop to start with, as the children get more proficient the size of the hoop can be decreased<br/> P- mix the children up and get them to work next to a child they usually don't work with, to help them improve their teamwork</p> |  | 3. Coordination and communication skills |
|                     | 4.                                                                                                                                                                                                                                                                                                                                                                                                                                                                                                                                                                                                                                                                                                                                  |  | 4.                                       |
| Formative feedback: | <p>a) recover start of the session by becoming frogs again<br/> b) big, middle, or small smiley</p>                                                                                                                                                                                                                                                                                                                                                                                                                                                                                                                                                                                                                                 |  |                                          |

**Table S8** Task 5.3: Matrices of change: Dissemination

| 3.0 Increase the number of delivery partners delivering The FMS School Project training                            |                                                                                                                                    |                                                                                                                                     |                                                                                                                                     |
|--------------------------------------------------------------------------------------------------------------------|------------------------------------------------------------------------------------------------------------------------------------|-------------------------------------------------------------------------------------------------------------------------------------|-------------------------------------------------------------------------------------------------------------------------------------|
| Performance objectives for programme dissemination                                                                 | Change Objectives for Determinants                                                                                                 |                                                                                                                                     |                                                                                                                                     |
|                                                                                                                    | Knowledge                                                                                                                          | Skills and self-efficacy                                                                                                            | Perceived Norms                                                                                                                     |
| <b>PO.3.1</b> Increase the number of schools receiving The FMS School Project information                          | <b>K.3.1.</b> Local authorities know how to disseminate information clearly and effectively about the programme and its components | <b>SSE.3.1.</b> Local authorities can confidently disseminate the benefits of the programme to schools in the local area            | <b>PN.3.1.</b> Local authorities can explain that it is normal to keep in contact with schools about FMS education                  |
| <b>PO.3.2</b> Increase the number of local authorities using delivery partners for The FMS School Project training | <b>K.3.2.</b> Local authorities know the scope, sequence, theme, and components of the programme                                   | <b>SSE.3.2.</b> Local authorities show they can identify the correct delivery partners to provide the programme training in schools | <b>PN.3.2.</b> Local authorities can explain it is normal to use this kind of training in schools and for public health improvement |

|                                                                                                                             |                                                                                                                  |                                                                                                          |                                                                                                                                    |
|-----------------------------------------------------------------------------------------------------------------------------|------------------------------------------------------------------------------------------------------------------|----------------------------------------------------------------------------------------------------------|------------------------------------------------------------------------------------------------------------------------------------|
| <b>PO.3.3 Increase the number of local authorities planning to use delivery partner for The FMS School Project training</b> | <b>K.3.3.</b> Local authorities know the benefits of using delivery partners for The FMS School Project training | <b>SSE.3.3.</b> Local authorities can plan to employ or identify existing employees as delivery partners | <b>PN.3.3.</b> Local authorities can explain that is expected that delivery partners are employed to deliver intervention training |
|-----------------------------------------------------------------------------------------------------------------------------|------------------------------------------------------------------------------------------------------------------|----------------------------------------------------------------------------------------------------------|------------------------------------------------------------------------------------------------------------------------------------|

FMS= fundamental movement skills

**Table S9** Task 5.3: Matrices of change: implementation and adoption

| <b>4.0 Increase the number of schools delivering The FMS School Project framework</b>            |                                                                                                                                                      |                                                                                                                                          |                                                                                                                                                        |  |
|--------------------------------------------------------------------------------------------------|------------------------------------------------------------------------------------------------------------------------------------------------------|------------------------------------------------------------------------------------------------------------------------------------------|--------------------------------------------------------------------------------------------------------------------------------------------------------|--|
| <b>Performance objectives for programme implementation and adoption</b>                          | <b>Change Objectives for Determinants</b>                                                                                                            |                                                                                                                                          |                                                                                                                                                        |  |
|                                                                                                  | <b>Knowledge</b>                                                                                                                                     | <b>Skills and self-efficacy</b>                                                                                                          | <b>Perceived Norms</b>                                                                                                                                 |  |
| <b>PO.4.1 Increase the number of schools receiving The FMS School Project training</b>           | <b>K.4.1.</b> Delivery partners know how to explain the scope, sequence, theme, and components of the programme (training and framework) to teachers | <b>SSE.4.1.</b> Delivery partners demonstrate the ability to plan the training delivery and offer support to teachers and SLT in schools | <b>PN.4.1.</b> Delivery partners explain that good continued professional development and training of teachers is important for children's development |  |
| <b>PO.4.2 Increase the number of schools planning to receive The FMS School Project training</b> | <b>K.4.2.</b> Delivery partners can explain the training and framework of the programme                                                              | <b>SSE.4.2.</b> Delivery partners demonstrate how to disseminate training to teachers and SLT in schools                                 | <b>PN.4.2.</b> Delivery partners explain good FMS of children at school is the result of sufficient continued professional development and knowledge   |  |
| <b>PO.4.3 Increase the number of schools interested in using The FMS School Project training</b> | <b>K.3.3.</b> Delivery partners know how to communicate with schools and SLT about the programme delivery                                            | <b>SSE.3.3.</b> Delivery partners can make a case for The FMS School Project training and framework                                      | <b>PN.3.3.</b> Delivery partners explain that other schools have successfully implemented The FMS School Project                                       |  |

FMS= fundamental movement skills, SLT= senior leadership team

**Table S10** Task 5.3: Matrices of change: maintenance

| <b>5.0 Increase the number of Schools using The FMS School Project framework for more than one school year</b> |                                                                                                                         |                                                                                                                                         |                                                                                                                                  |  |
|----------------------------------------------------------------------------------------------------------------|-------------------------------------------------------------------------------------------------------------------------|-----------------------------------------------------------------------------------------------------------------------------------------|----------------------------------------------------------------------------------------------------------------------------------|--|
| <b>Performance objectives for programme maintenance</b>                                                        | <b>Change Objectives for Determinants</b>                                                                               |                                                                                                                                         |                                                                                                                                  |  |
|                                                                                                                | <b>Knowledge</b>                                                                                                        | <b>Skills and self-efficacy</b>                                                                                                         | <b>Perceived Norms</b>                                                                                                           |  |
| <b>PO.5.1 Increase the number of teachers evaluating The FMS School Project framework at the EYFS</b>          | <b>K.5.1.</b> Teachers can explain the evaluation methods of the programme to identify success and areas of improvement | <b>SSE.5.1.</b> Teachers can demonstrate the ability to evaluate the programme over the whole year, including its individual component. | <b>PN.5.1.</b> Teachers can explain schools like ours are providing The FMS Schools Project framework to children at the EYFS    |  |
| <b>PO.5.2 Increase the number of SLTs granting the appropriate funds for The FMS School Project</b>            | <b>K.5.2.</b> SLT can explain how to use the PE primary funding for The FMS School Project                              | <b>SSE.5.2.</b> SLT can use the appropriate funding for equipment and the training of staff                                             | <b>PN.5.2.</b> SLT can explain that successful FMS School Project programmes in their school are a result of the correct funding |  |

|                                                                                                                  |                                                                                                              |                                                                                                                 |                                                                                                                                         |
|------------------------------------------------------------------------------------------------------------------|--------------------------------------------------------------------------------------------------------------|-----------------------------------------------------------------------------------------------------------------|-----------------------------------------------------------------------------------------------------------------------------------------|
| <b>PO.5.3 Increase the number of schools providing the appropriate time for The FMS School Project framework</b> | <b>K.5.3.</b> SLTs and teachers can explain how to use time effectively for FMS development in EYFS children | <b>SSE.5.3.</b> SLT and teachers can use timetabling and planning in the school year for The FMS School Project | <b>PN.5.3.</b> SLT and teachers can explain that successful FMS programmes have sufficient time within the school year allotted to them |
|------------------------------------------------------------------------------------------------------------------|--------------------------------------------------------------------------------------------------------------|-----------------------------------------------------------------------------------------------------------------|-----------------------------------------------------------------------------------------------------------------------------------------|

FMS= fundamental movement skills, SLT= senior leadership team, EYFS= early years foundation stage

**Table S11** Task 5.3: Matrices of change: maintenance

| <b>6.0 Increase the number of delivery partners delivering The FMS School Project training for more than one school year</b>       |                                                                                                                                                        |                                                                                                                                             |                                                                                                                                              |  |
|------------------------------------------------------------------------------------------------------------------------------------|--------------------------------------------------------------------------------------------------------------------------------------------------------|---------------------------------------------------------------------------------------------------------------------------------------------|----------------------------------------------------------------------------------------------------------------------------------------------|--|
| <b>Performance objectives for programme maintenance</b>                                                                            | <b>Change Objectives for Determinants</b>                                                                                                              |                                                                                                                                             |                                                                                                                                              |  |
|                                                                                                                                    | <b>Knowledge</b>                                                                                                                                       | <b>Skills and self-efficacy</b>                                                                                                             | <b>Perceived Norms</b>                                                                                                                       |  |
| <b>PO.6.1 Increase the number of delivery partners/local authorities evaluating The FMS School Project training</b>                | <b>K.6.1.</b> Delivery partners and local authorities can explain the evaluation methods of the programme to identify success and areas of improvement | <b>SSE.6.1.</b> Local authorities can demonstrate the ability to evaluate the training programme over the whole year                        | <b>PN.6.1.</b> Local authorities can explain areas like ours are providing The FMS Schools Project training to teachers                      |  |
| <b>PO.6.2 Increase the number of local authorities granting the appropriate funds for The FMS School Project training delivery</b> | <b>K.6.2.</b> Local authorities explain how to allot funding for employment of delivery partners for The FMS School Project training                   | <b>SSE.6.2.</b> Local authorities can use the appropriate funding for employment and training of delivery partner staff                     | <b>PN.6.2.</b> Local authorities can explain that successful FMS School Project programmes in their area are a result of the correct funding |  |
| <b>PO.6.3 Increase the number of local authorities providing the appropriate time for The FMS School Project training</b>          | <b>K.6.3.</b> Local authorities can explain how to use time effectively for The FMS School Project training                                            | <b>SSE.6.3.</b> Local authorities can allow delivery partners appropriate time to plan, prepare and deliver The FMS School Project training | <b>PN.6.3.</b> Local authorities can explain that successful FMS School Project training have sufficient time to train teachers in schools   |  |

FMS= fundamental movement skills

**Table S12** Step 6: Planning group Focus group themes and comments

| <b>Step 6 areas</b> | <b>Researcher's themes and quotes</b>                                                                                                                                           | <b>Parents themes and quotes</b>                                                                                                                        | <b>Teachers, coaches, SLT themes and quotes</b>                                 |
|---------------------|---------------------------------------------------------------------------------------------------------------------------------------------------------------------------------|---------------------------------------------------------------------------------------------------------------------------------------------------------|---------------------------------------------------------------------------------|
| Assessment methods  | 'The methods need to be fun and simple, especially for the children'<br>'Process evaluations and formative feedback'<br>'Logbooks- physical literacy tracking, self-reflection' | 'Real-world success measured better using a qualitative questioning approach [for adults]'<br>'Offer children new opportunities and observe the uptake' | 'For me to do it [the intervention] and get feedback [from a delivery partner]' |

|                          |                                                                                                                                                                                                                              |                                                                                                                                                                                             |                                                                                                                                                                   |
|--------------------------|------------------------------------------------------------------------------------------------------------------------------------------------------------------------------------------------------------------------------|---------------------------------------------------------------------------------------------------------------------------------------------------------------------------------------------|-------------------------------------------------------------------------------------------------------------------------------------------------------------------|
| Reporting                | 'Schools can use the images from a children's write, draw, show and tell activity'<br>'Evidence of grants being used for the programme'<br>Using tools that are being developed by researchers to be implemented in schools. | 'Sit within the school's existing reporting framework'<br>'Should be integral and made compulsory'<br>'Schools reporting, they are using the programme to educate their staff'              | 'Having learning outcomes are a big one'<br>'a clear expectation of what resources would be required...depending on cost'                                         |
| What should be assessed? | 'How did the people using the intervention find it?'<br>'The enjoyment and development of the children using the programme'<br>'parent's expectations of the programme'                                                      | 'The quality of the PE [framework sessions] being provided in school'<br>'Culture change within schools by the senior leadership team'<br>'children's confidence to take part in new sport' | 'The longevity in it'<br>'PE is one of the lessons that teachers plan the least, so this should be assessed'<br>'We should also develop our practices [teachers]' |

PE= physical education

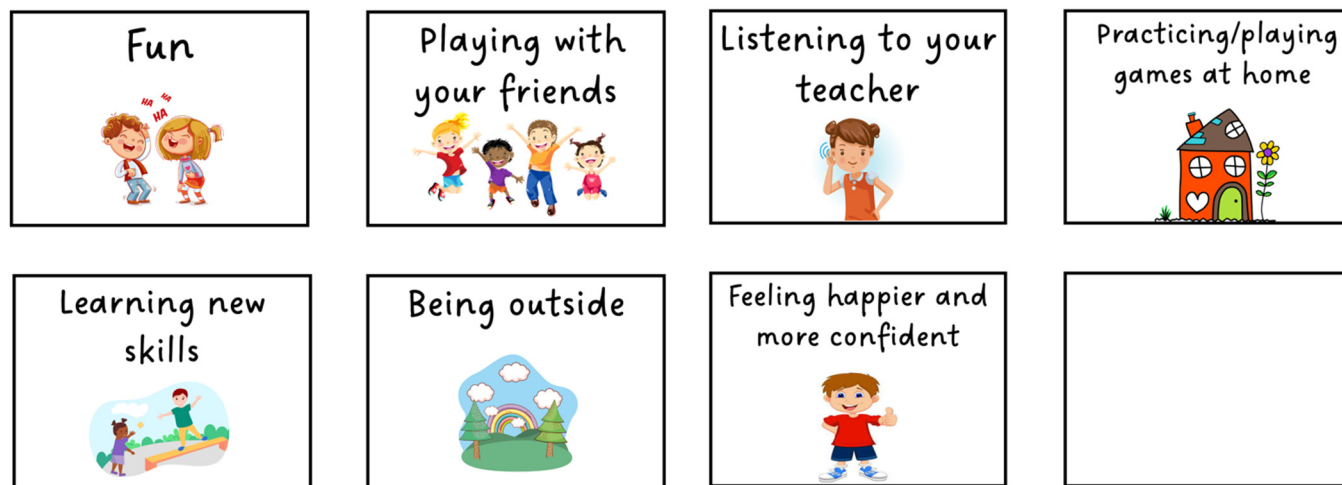

**Figure S4.** Task 6.4: Child Process Evaluation Card Sort

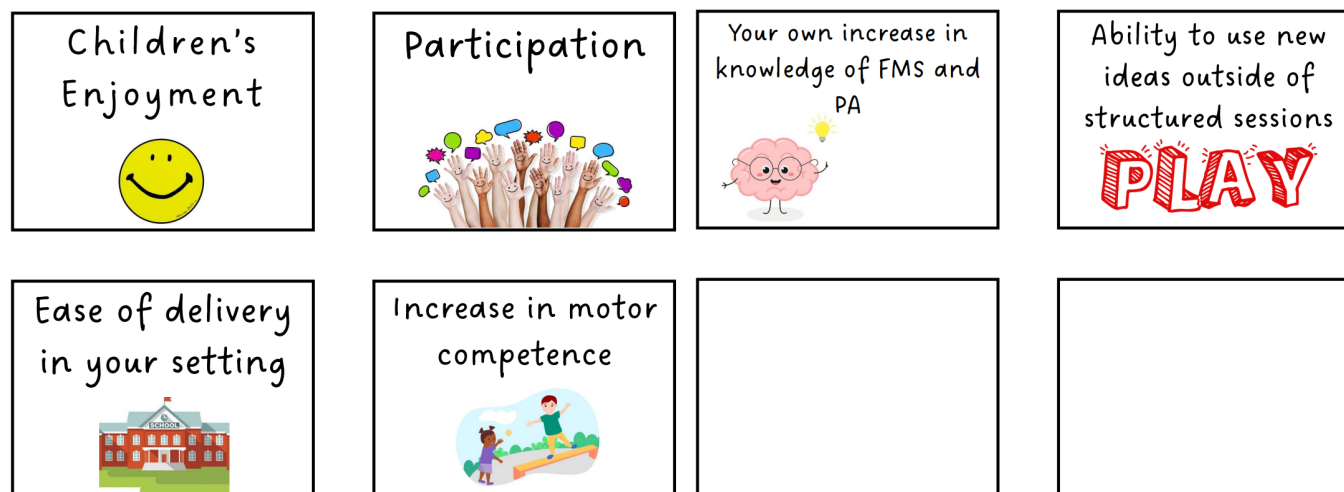

**Figure S5.** Teacher card sort
